# Supplementary material
Source: Springer Nature journal article supplement (https://www.springermedizin.de/resource/supplementary/13012_2014_852_MOESM1_ESM.pdf/9630610)
Supplement: MOESM1 [file 9630610]

## APPENDIX A

| Table 1. <i>The MTFC-SIC from the MTFC Implementation Trial: Activity within Pre-Implementation (Pre-Imp), Implementation (Imp), and Sustainability (Sus) Phases.</i> |                                                                           |                                                                                                                                                                                                                                                                                                                                             |                                           |
|-----------------------------------------------------------------------------------------------------------------------------------------------------------------------|---------------------------------------------------------------------------|---------------------------------------------------------------------------------------------------------------------------------------------------------------------------------------------------------------------------------------------------------------------------------------------------------------------------------------------|-------------------------------------------|
| Phase                                                                                                                                                                 | Stage                                                                     | Activity                                                                                                                                                                                                                                                                                                                                    | Agent Involved                            |
| Pre-Imp                                                                                                                                                               | Stage 1: Engagement                                                       | Date site informed services/program available (not scored)<br>Date of interest indicated<br>Date agreed to consider implementation                                                                                                                                                                                                          | System Leader                             |
| Pre-Imp                                                                                                                                                               | Stage 2: Consideration of Feasibility                                     | Date of response to first planning contact<br>Date of first meeting/ Feasibility Assessment<br>Date feasibility questionnaire completed                                                                                                                                                                                                     | System Leader,<br>Agency                  |
| Pre-Imp                                                                                                                                                               | Stage 3: Readiness Planning                                               | Date of cost/funding plan review<br>Date of staff sequence, timeline, hire plan review<br>Date of Foster Parent recruitment review<br>Date of referral criteria review<br>Date of communication plan review<br>Date of Meeting #2/ Stakeholder meeting<br>Date written implementation plan completed<br>Date MTFC Service Provider Selected | System Leader,<br>Agency                  |
| Imp                                                                                                                                                                   | Stage 4: Staff Hired & Trained                                            | Date agency checklist completed<br>Date 1 <sup>st</sup> staff hired<br>Date Program Supervisor trained<br>Date clinical training held<br>Date Foster Parent training held<br>Date Expert Consultant assigned to site                                                                                                                        | Agency,<br>Practitioner                   |
| Imp                                                                                                                                                                   | Stage 5: Adherence Monitoring processes in place                          | Date Parent Daily Report training held (fidelity measure)<br>Date of 1 <sup>st</sup> program administrator call                                                                                                                                                                                                                             | Agency,<br>Practitioner                   |
| Imp                                                                                                                                                                   | Stage 6: Services and Consultation Begin                                  | Date of first placement<br>Date of first consult call<br>Date of first clinical meeting video received<br>Date of first foster parent meeting video received                                                                                                                                                                                | Practitioner,<br>Child/Family             |
| Imp                                                                                                                                                                   | Stage 7: Ongoing services, consultation, fidelity monitoring and feedback | Dates of site visits (3)<br>Date of implementation review (3)<br>Date of final program assessment                                                                                                                                                                                                                                           | Practitioner,<br>Child/Family             |
| Sus                                                                                                                                                                   | Stage 8: Competency                                                       | Date of certification application<br>Date certified                                                                                                                                                                                                                                                                                         | System Leader,<br>Agency,<br>Practitioner |
